# Supplementary figures and images for: IGFBP1 increases β‐cell regeneration by promoting α‐ to β‐cell transdifferentiation
Source: PubMed Central journal article supplement — EMBO J. 2016 Aug 11;35(18):2026–44. doi: 10.15252/embj.201592903 (PMC5116948; doi:10.15252/embj.201592903), 2016-08-11

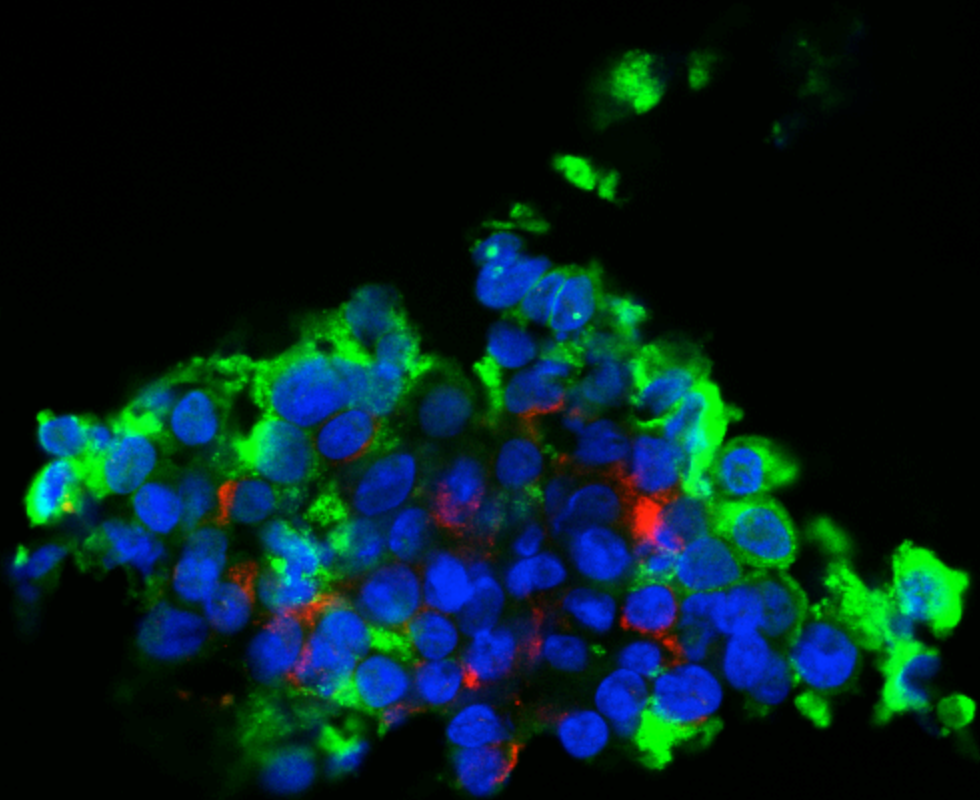

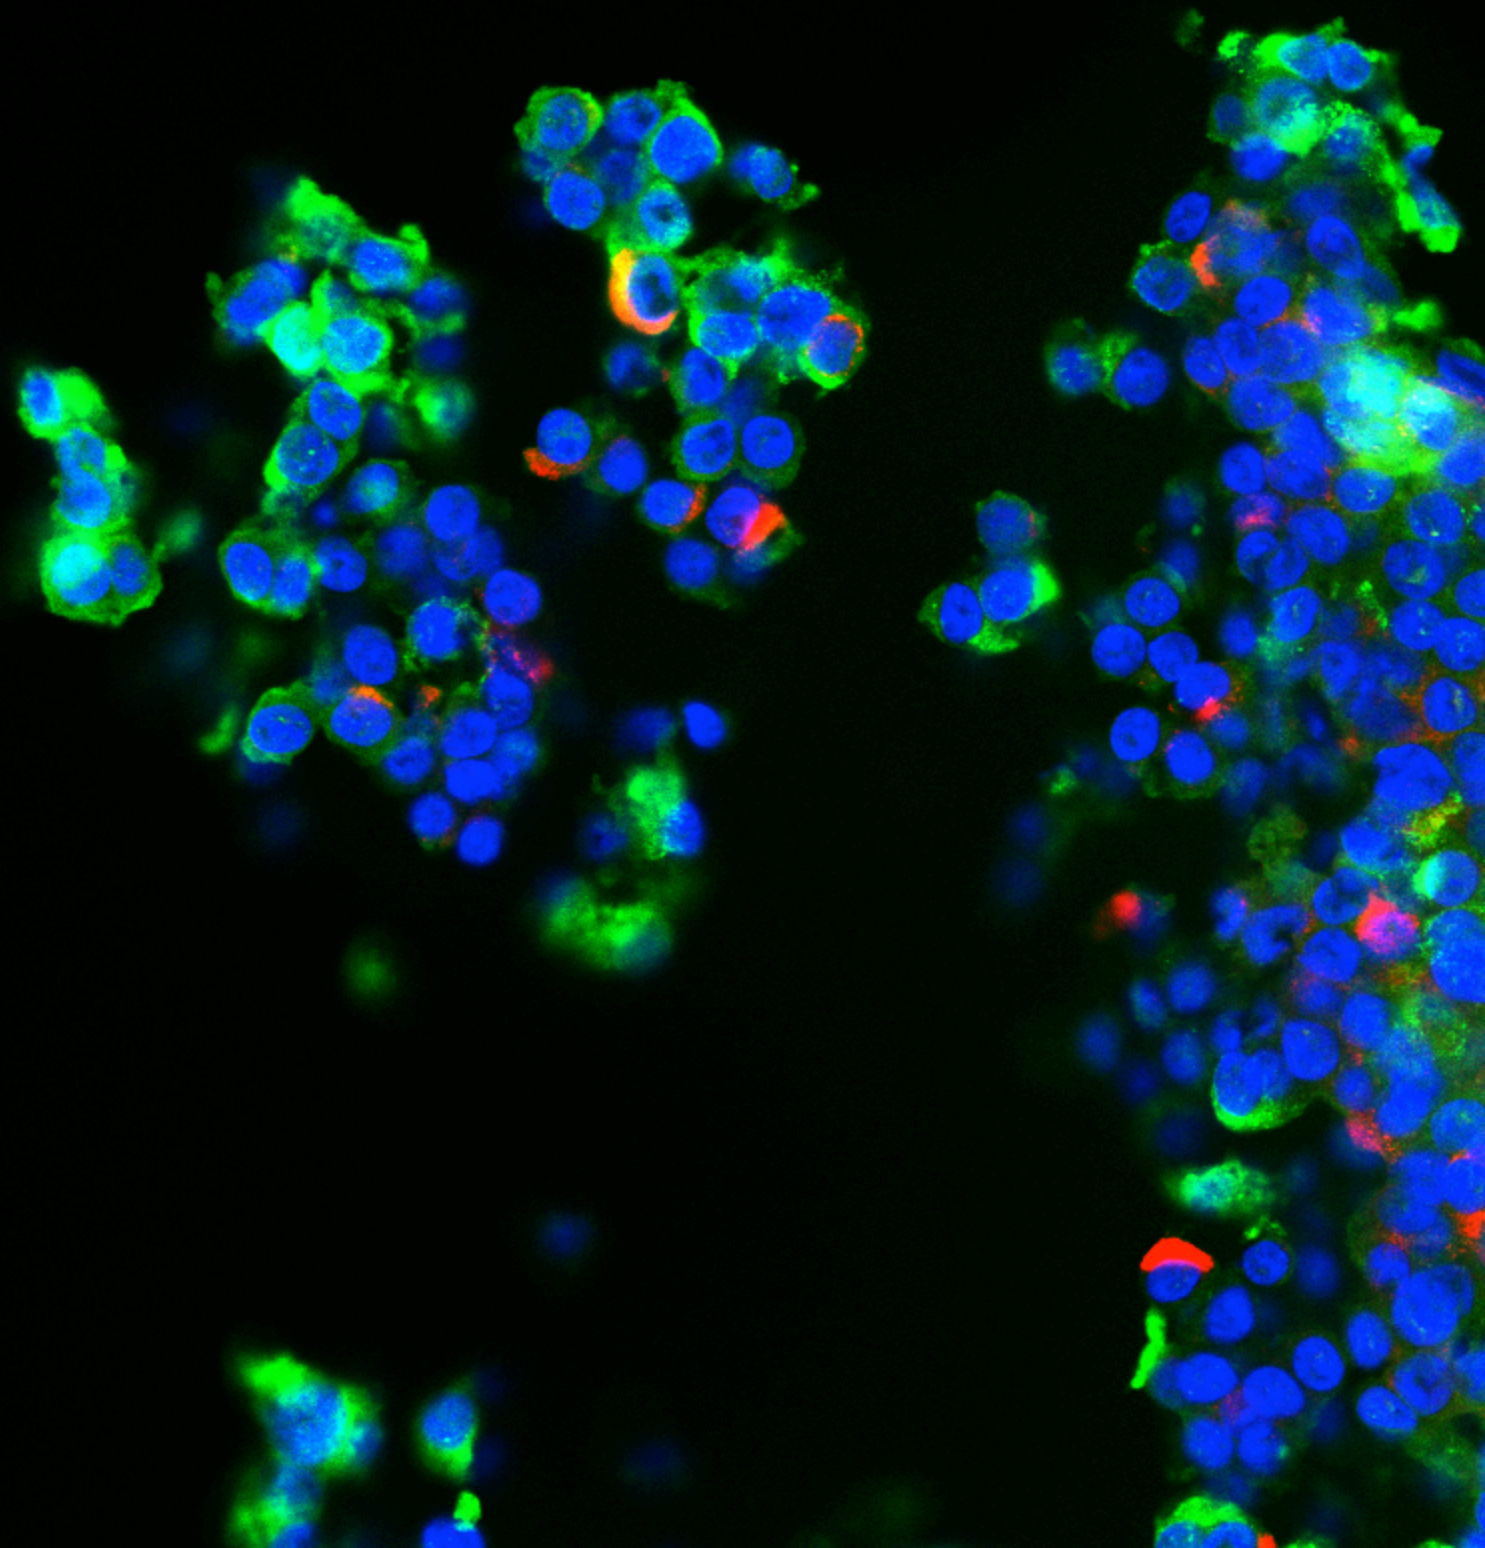

Supplement: EMBJ-35-2026-s003.pdf [file EMBJ-35-2026-s003.pdf]
